# Supplementary material for: Direct Characterization of Transcription Elongation by RNA Polymerase I
Source: PLoS One. 2016 Jul 25;11(7):e0159527. doi: 10.1371/journal.pone.0159527 (PMC4959687; doi:10.1371/journal.pone.0159527)
Supplement: S3 File — RNA Polymerase processivity as measured by gel electrophoresis. (XLSX) [file pone.0159527.s011.xlsx]

## Sheet: Sheet1
	counts	norm to G #	ratio 800/56	average processivity	3 exp average	st dev
56	7110.11	309.135
800	19348.5	95.7848	0.309848
800	21263.2	105.263	0.340509	0.318483
800	18154	89.8713	0.290718
800	20785.4	102.898	0.332857
					0.313498	0.00733446
56	1361.01	59.1742
800	3622.47	17.933	0.303055
800	3518.64	17.419	0.294368	0.316936
800	3689.7	18.2658	0.308679
800	4322.76	21.3998	0.36164
56	3893.36	169.277
800	11119.4	55.0464	0.325186
800	8902.27	44.0706	0.260347
800	10052.6	49.7653	0.293988	0.305077
800	11652.8	57.6871	0.340786
Gs in +55	23
Gs in +800	202
